# Supplementary material
Source: publisher site journal article supplement (https://www.dovepress.com/article/328423)
Supplement: Supplementary file 1 [file get_supplementary_file.php]

**Appendix 1: Full search strategy conducted on October 18, 2021.**

**PUBMED**

1. older adults
2. older people
3. elderly
4. aged
5. aging
6. ageing
7. older person
8. #1 OR #2 OR #3 OR #4 OR #5 OR #6 OR #7
9. fear-related activity restriction
10. fear of falls
11. fear of falling
12. fear
13. fall-related
14. self-efficacy
15. balance confidence fear-associated
16. related mobility restriction
17. activity restriction
18. fall-related efficacy
19. falls-efficacy
20. self-confidence
21. #9 OR #10 OR #11 OR #12 OR #13 OR #14 OR #15 OR #16 OR #17 OR #18 OR #19 OR #20
22. frail*
23. #8 AND #21 AND #22

**EMBASE**

1. older adults
2. older people
3. elderly
4. aged
5. aging
6. ageing
7. older person
8. #1 OR #2 OR #3 OR #4 OR #5 OR #6 OR #7
9. fear-related activity restriction
10. fear of falls
11. fear of falling
12. fear
13. fall-related
14. self-efficacy
15. balance confidence fear-associated
16. related mobility restriction
17. activity restriction
18. fall-related efficacy
19. falls-efficacy
20. self-confidence
21. #9 OR #10 OR #11 OR #12 OR #13 OR #14 OR #15 OR #16 OR #17 OR #18 OR #19 OR #20
22. frail*
23. #8 AND #21 AND #22

**CINAHL**

1. older adults OR older people OR elderly OR aged OR aging OR ageing OR older person
2. fear-related activity restriction OR fear of falls OR fear of falling OR fear OR fall-related OR self-efficacy OR balance confidence fear-associated OR related mobility restriction OR activity restriction OR fall-related efficacy OR falls-efficacy OR self-confidence
3. frail*
4. 1 AND 2 AND 3

**SCOPUS**

1. older adults OR older people OR elderly OR aged OR aging OR ageing OR older person
2. fear-related activity restriction OR fear of falls OR fear of falling OR fear OR fall-related OR self-efficacy OR balance confidence fear-associated OR related mobility restriction OR activity restriction OR fall-related efficacy OR falls-efficacy OR self-confidence
3. frail*
4. 1 AND 2 AND 3
